# Supplementary material for: A Self-Assembling Pfs230D1-Ferritin Nanoparticle Vaccine Has Potent and Durable Malaria Transmission-Reducing Activity
Source: MDPI journal article supplement (doi:10.3390/vaccines12050546), 2024-05-16
Supplement: s1 [file s1]

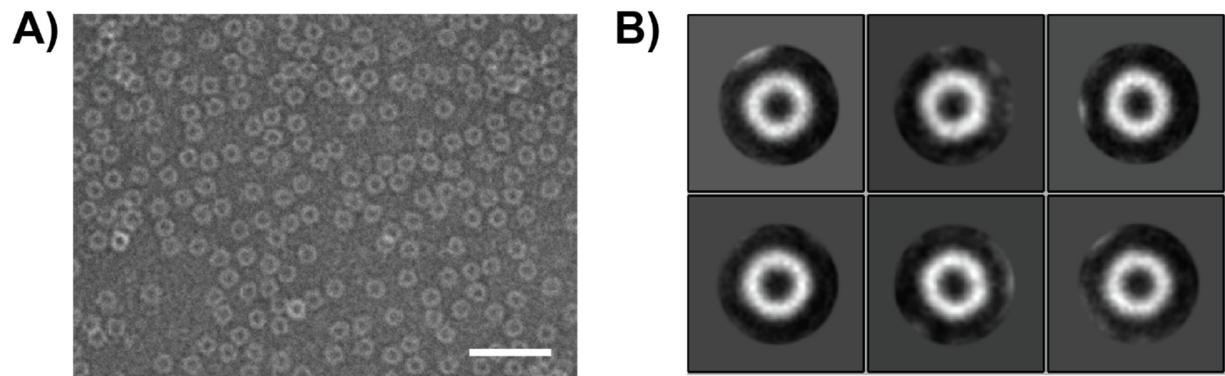

**Figure S1.** Ferritin forms a nanoparticle. (A) Negative-stain electron microscopy image of ferritin, scale bar = 50 nm, with (B) 2D classification averages.

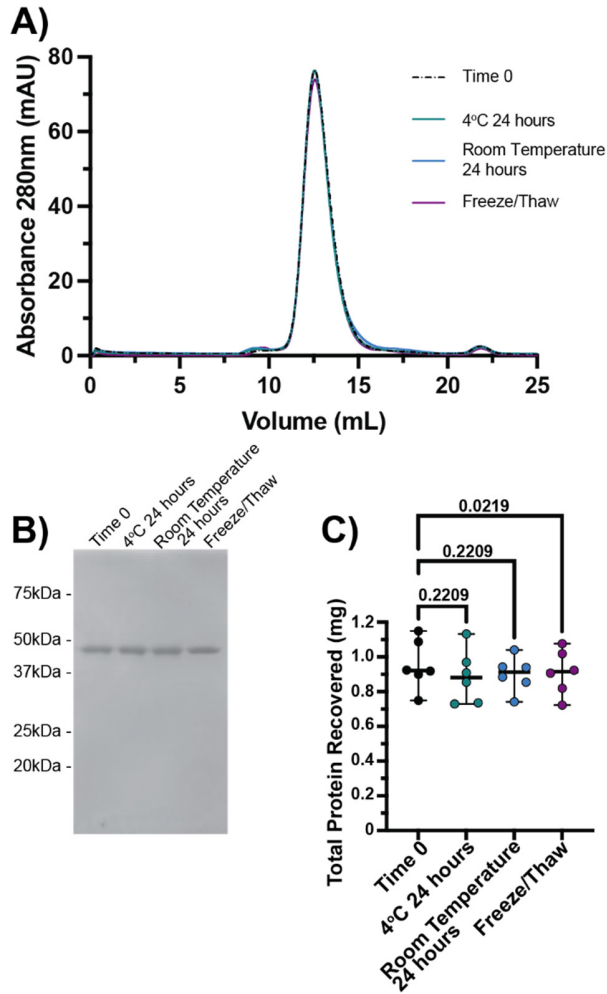

**Figure S2.** Pfs230D1-ferritin is stable under multiple conditions. (A) One representative experiment of the size exclusion purification of Pfs230D1-ferritin at time 0, after incubation at 4°C or room temperature for 24 hours or one cycle of freeze/thaw and (B) SDS-PAGE. (C) Individual amounts of total protein recovered by size exclusion chromatography at time 0, and after incubation at 4°C or room temperature for 24 hours, and one cycle of freeze/thaw, median and 95% confidence interval shown, p-values determined by Friedman test with Dunn's multiple comparisons test.

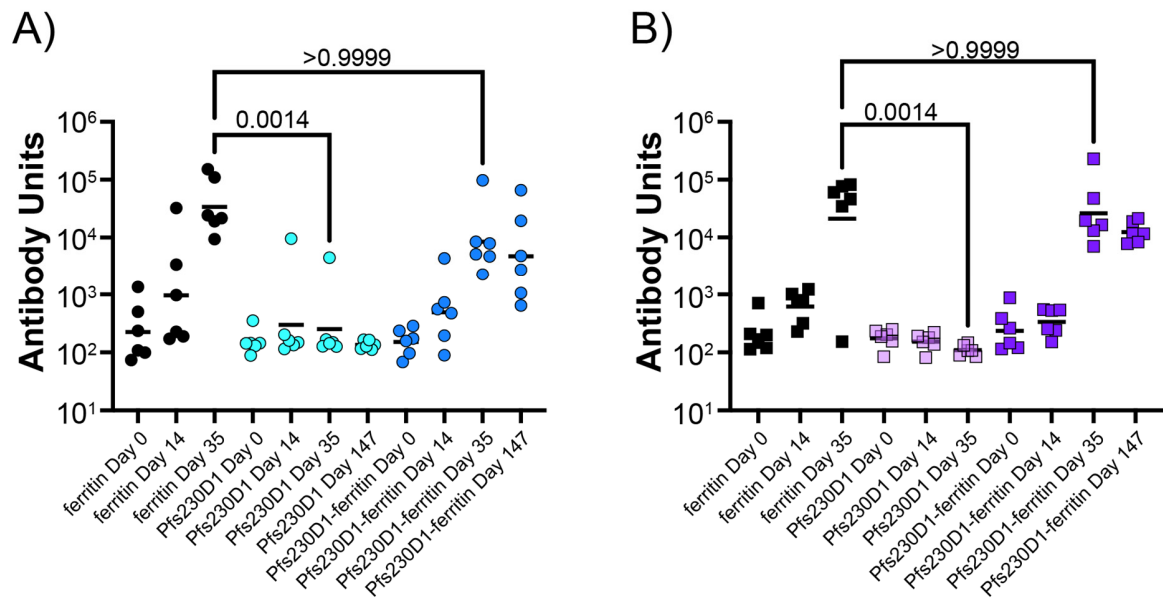

**Figure S3.** Ferritin specific titers induced by immunization with Pfs230D1, Pfs230D1-ferritin, and ferritin adjuvanted with either (A) Alhydrogel or (B) AddaS03, bars = median, p-values determined by a Kruskal-Wallis test followed by Dunn's multiple comparisons.

**Table S1.** Pfs230D1 and ferritin median titers over time.

|                                     | Median Pfs230D1 Titers |         |         | Median ferritin Titers |        |         |
|-------------------------------------|------------------------|---------|---------|------------------------|--------|---------|
|                                     | Day 14                 | Day 35  | Day 147 | Day 14                 | Day 35 | Day 147 |
| <b>Pfs230D1/Alhydrogel</b>          | 852                    | 67,107  | 31,600  | 155                    | 146    | 131     |
| <b>Pfs230D1-ferritin/Alhydrogel</b> | 2,789                  | 35,080  | 14,928  | 518                    | 6,512  | 3,772   |
| <b>ferritin/Alhydrogel</b>          | 47                     | 50      |         | 600                    | 23,010 |         |
| <b>Pfs230D1/AddaS03</b>             | 20                     | 111     |         | 166                    | 108    |         |
| <b>Pfs230D1-ferritin/AddaS03</b>    | 2,958                  | 228,250 | 35,287  | 392                    | 18,045 | 11,653  |
| <b>ferritin/AddaS03</b>             | 36                     | 40      |         | 782                    | 53,300 |         |

**Table S2.** Transmission reducing activity and the 95% confidence intervals in individual assays for all samples.

|             | Sample name                  | Sample, Day Collected | IgG conc [ug/mL] | % Inhibition |            |             |         |
|-------------|------------------------------|-----------------------|------------------|--------------|------------|-------------|---------|
|             |                              |                       |                  | Estimate     | 95% CI Low | 95% CI High | p-value |
| SMFA #364   | ferritin Alhydrogel          | 35                    | 3,000            | 2.1          | -122.4     | 59.8        | 0.975   |
|             | ferritin AddaS03             | 35                    | 3,000            | -49.9        | -244.7     | 37.4        | 0.344   |
|             | Pfs230D1Alhydrogel           | 35                    | 3,000            | 98.8         | 94.8       | 99.6        | 0.001   |
|             | Pfs230D1Alhydrogel           | 35                    | 1,000            | 99.5         | 98.7       | 99.9        | 0.001   |
|             | Pfs230D1Alhydrogel           | 35                    | 333              | 91.6         | 80.1       | 96.4        | 0.001   |
|             | Pfs230D1Alhydrogel           | 35                    | 111              | -8.4         | -146.8     | 52.9        | 0.837   |
|             | Pfs230D1-ferritin Alhydrogel | 35                    | 3,000            | 99.5         | 97.6       | 99.7        | 0.001   |
|             | Pfs230D1-ferritin Alhydrogel | 35                    | 1,000            | 98.1         | 95.2       | 99.4        | 0.001   |
|             | Pfs230D1-ferritin Alhydrogel | 35                    | 333              | 81.0         | 55.8       | 91.7        | 0.001   |
|             | Pfs230D1-ferritin Alhydrogel | 35                    | 111              | -25.5        | -188.0     | 43.2        | 0.566   |
|             | Pfs230D1 AddaS03             | 35                    | 3,000            | 93.4         | 85.2       | 97.2        | 0.001   |
|             | Pfs230D1 AddaS03             | 35                    | 1,000            | 61.4         | 12.8       | 83.3        | 0.022   |
|             | Pfs230D1 AddaS03             | 35                    | 333              | -18.0        | -169.8     | 47.2        | 0.707   |
|             | Pfs230D1 AddaS03             | 35                    | 111              | -12.6        | -160.0     | 51.5        | 0.780   |
|             | Pfs230D1-ferritin AddaS03    | 35                    | 3,000            | 100.0        | 99.4       | 100.0       | 0.001   |
|             | Pfs230D1-ferritin AddaS03    | 35                    | 1,000            | 100.0        | 99.4       | 100.0       | 0.001   |
|             | Pfs230D1-ferritin AddaS03    | 35                    | 333              | 99.5         | 98.2       | 99.9        | 0.001   |
|             | Pfs230D1-ferritin AddaS03    | 35                    | 111              | 89.9         | 77.3       | 96.1        | 0.001   |
| SMFA #367-1 | Pfs230D1 AddaS03             | 35                    | 333              | 9.3          | -93.1      | 59.5        | 0.806   |
|             | Pfs230D1 AddaS03             | 35                    | 111              | -10.2        | -144.4     | 52.4        | 0.795   |
|             | Pfs230D1-ferritin AddaS03    | 35                    | 333              | 99.5         | 98.6       | 99.9        | 0.001   |
|             | Pfs230D1-ferritin AddaS03    | 35                    | 111              | 86.6         | 64.0       | 97.3        | 0.001   |
| SMFA #377-2 | Pfs230D1Alhydrogel           | 35                    | 333              | 32.7         | -42.8      | 69.5        | 0.311   |
|             | Pfs230D1Alhydrogel           | 35                    | 111              | 3.5          | -119.4     | 57.4        | 0.915   |
|             | Pfs230D1-ferritin Alhydrogel | 35                    | 333              | 49.4         | -7.5       | 77.4        | 0.080   |
|             | Pfs230D1-ferritin Alhydrogel | 35                    | 111              | -28.1        | -182.4     | 43.1        | 0.552   |
| SMFA #372-2 | Pfs230D1Alhydrogel           | 147                   | 3,000            | 70.0         | 33.9       | 86.2        | 0.002   |
|             | Pfs230D1Alhydrogel           | 147                   | 1,000            | -6.4         | -132.3     | 52.7        | 0.884   |
|             | Pfs230D1-ferritin Alhydrogel | 147                   | 3,000            | 94.8         | 87.5       | 98.3        | 0.001   |
|             | Pfs230D1-ferritin Alhydrogel | 147                   | 1,000            | 69.4         | 29.5       | 87.7        | 0.003   |
|             | Pfs230D1-ferritin AddaS03    | 147                   | 3,000            | 96.4         | 91.4       | 98.7        | 0.001   |
|             | Pfs230D1-ferritin AddaS03    | 147                   | 1,000            | 65.8         | 24.0       | 85.1        | 0.005   |
| SMFA #377-2 | Pfs230D1Alhydrogel           | 147                   | 3,000            | 76.0         | 45.3       | 90.7        | 0.001   |
|             | Pfs230D1Alhydrogel           | 147                   | 1,000            | -11.9        | -128.8     | 49.3        | 0.772   |
|             | Pfs230D1-ferritin Alhydrogel | 147                   | 3,000            | 91.3         | 80.6       | 96.3        | 0.001   |
|             | Pfs230D1-ferritin Alhydrogel | 147                   | 1,000            | 60.2         | 12.5       | 82.1        | 0.016   |
|             | Pfs230D1-ferritin AddaS03    | 147                   | 3,000            | 98.9         | 97.4       | 99.6        | 0.001   |
|             | Pfs230D1-ferritin AddaS03    | 147                   | 1,000            | 73.6         | 41.8       | 88.5        | 0.001   |
